1 **Retrospective analysis of the clinical characteristics of *Candida auris* infection cases over a**  
2 **10-year period<sup>1</sup>**

3 Shan Hu,<sup>a,b,c,#</sup> Yuehua Wang,<sup>a,d,#</sup> Weiwei Jiang,<sup>e,#</sup> Feilong Zhu,<sup>f</sup> Yongqiang Quan,<sup>g</sup> Guoming  
4 Zhang,<sup>h</sup> Feng Gu,<sup>b</sup> Bing Gu,<sup>c,i,\*</sup> Ying Yang<sup>a,\*</sup>

5 <sup>a</sup> Department of Biotechnology, Beijing Institute of Radiation Medicine, Beijing, People's  
6 Republic of China; Beijing Key Laboratory of New Molecular Diagnosis Technologies for  
7 Infectious Diseases, Beijing, People's Republic of China.

8 <sup>b</sup> Department of Laboratory Medicine, Xuzhou Tumor Hospital, Xuzhou, People's Republic of  
9 China.

10 <sup>c</sup> Medical Technology School of Xuzhou Medical University, Xuzhou Key Laboratory of  
11 Laboratory Diagnostics, Xuzhou, People's Republic of China.

12 <sup>d</sup> Department of Life Science, Hebei University, Baoding, People's Republic of China.

13 <sup>e</sup> Shanghai Key Laboratory of Molecular Medical Mycology, Shanghai Institute of Mycology,  
14 Shanghai Changzheng Hospital, Second Military Medical University, Shanghai, People's  
15 Republic of China.

16 <sup>f</sup> The Affiliated Xuzhou Rehabilitation Hospital of Xuzhou Medical University, Xuzhou  
17 Rehabilitation Hospital, Xuzhou, People's Republic of China.

18 <sup>g</sup> Department of Nephrology, Affiliated Huaihai Hospital of Xuzhou Medical University, Xuzhou ,

---

<sup>1</sup> Correspondence:

Ying Yang, Department of Biotechnology, Beijing Institute of Radiation Medicine, Beijing, PR China; Beijing Key Laboratory of New Molecular Diagnosis Technologies for Infectious Diseases, Beijing, 100850, PR China.

Email: [y\\_ying\\_77@163.com](mailto:y_ying_77@163.com)

Bing Gu, Department of Laboratory Medicine, Affiliated Hospital of Xuzhou Medical University, Xuzhou, PR China.

E-mail: [binggu2015@xzhmu.edu.cn](mailto:binggu2015@xzhmu.edu.cn)

Author contributions:

Y.Y. and B.G. conceived and designed the study. S.H., Y.W., W.J. and Y.Q. collated and collected data, F.Z., G.Z. and F.G. did the statistical analysis. S.H., Y.W., W.J. and Y.Y. drafted the manuscript. All authors played a significant role in data collection and analysis.

#S.H., Y.W. and W.J. contributed equally to this work.

19 People's Republic of China.

20 <sup>h</sup> Department of Laboratory Medicine, Shuyang People's Hospital, The affiliated Shuyang  
21 Hospital of Xuzhou Medical University, Shuyang, People's Republic of China.

22 <sup>i</sup> Department of Laboratory Medicine, The Affiliated Hospital of Xuzhou Medical University,  
23 Xuzhou, People's Republic of China.

24

25 Running Head: Characteristics of *C. auris* infections over 10 years.

26 Word count: The word count of the abstract is 249 and the text is 4041.

27

## 28 **Abstract**

29 *Candida auris* is an emerging multidrug-resistant fungus with a high mortality rate. The first  
30 case of *Candida auris* infection was reported in 2009 and since then infections have been reported  
31 in nearly 40 countries. The fungus now represents a major global public health threat. We analyzed  
32 cases from the emergence of *Candida auris* infections up until the end of 2019.

33 PubMed and Web of Science databases were searched for all papers related to *Candida auris*  
34 infections up until 31 December 2019. We organized these data into the following categories: date  
35 of publication, patient age and gender, underlying diseases, risk factors for infection, patient  
36 mortality information, drug sensitivity information of *Candida auris* isolates, and genetic  
37 classification. The  $\chi^2$  test was used to screen for factors that may affect patient mortality before  
38 logistic regression analysis was used to further assess the suspected influencing factors to  
39 determine if they represent independent factors for patient mortality.

40 Information pertaining to 542 patients was included. There were more male patients than  
41 female patients and the mortality rate was higher in males than females. A high proportion of  
42 patients were premature babies and elderly people. The proportions of patients with underlying

43 diseases such as diabetes, kidney disease, and ear disease were also high. 65% of patients had a  
44 history in ICU and 60% were given broad-spectrum antibiotics. Logistic regression analysis  
45 revealed that kidney disease ( $P<0.05$ ) and tumors ( $P<0.05$ ) are independent factors that affect  
46 mortality in *Candida auris*-infected patients. Patients infected with echinocandin-resistant  
47 *Candida auris* ultimately die.

48 **Keywords:** *Candida auris*; Infection characteristics; Risk factors; Drug-resistant; Influencing  
49 factor for mortality.

50

51

## 52 **Introduction**

53        Since 2009 when the first *Candida auris* infection case was reported in Japan (1) until 31  
54        December 2019, *Candida auris* infections have been reported in nearly 40 countries around the  
55        world (2). In April 2019, the New York Times reported a multidrug-resistant fungal infection  
56        outbreak in many parts of the United States. The causative agent of this outbreak was *Candida*  
57        *auris*; however, the aforementioned article referred to the infections as “mysterious infections” and  
58        deemed the outbreak an “urgent threat”. Nearly 50% of infected individuals died within 90 days  
59        and the outbreak subsequently attracted widespread global attention (3). Because of the associated  
60        high mortality rates, *Candida auris* can now be considered a major global public health threat (4).

61        Before 2009, *Candida auris* was thought to be a rarely observed microorganism and as a  
62        result it is now deemed an emerging human pathogen (5). *Candida auris* can colonize different  
63        sites, such as the skin, axilla, nose, and groin and is transmitted by contact or through feces. In  
64        addition, the pathogen can survive on inanimate object surfaces for more than 7 days (6, 7).  
65        Therefore, hospital beds, sphygmometers, thermometers, and other reusable equipment are  
66        potential infection sources for inpatients. This has resulted in relatively high rates of *Candida auris*  
67        transmission in inpatients, particularly in ICU rooms (8). This latter phenomenon has led to a  
68        vicious cycle of acquisition, transmission, and infection (9, 10). It is hard to eradicate *Candida*  
69        *auris* once it has colonized a patient and colonization of patients can last for 3 or more continuous  
70        months (11). Even though many countries have implemented infection prevention and control  
71        (IPC) strategies, *Candida auris* transmission is still a problem that warrants attention.

72        The appearance of multidrug resistance (MDR) in *Candida auris* is another problem that has  
73        attracted global attention in recent years (12). The sensitivity of many *Candida auris* isolates  
74        towards fluconazole has decreased and associated strains have developed varying degrees of

75 resistance to other antifungal drugs (13). Public health guidelines recommend that echinocandins  
76 (micafungin, caspofungin, anidulafungin) should be used as first-line treatments for *Candida auris*  
77 infections (14, 15). However, the continuous evolution of *Candida auris* has resulted in  
78 echinocandin resistance. Indeed, the minimum inhibitory concentrations (MIC) of some isolates  
79 towards azoles, amphotericin B, and echinocandin have even increased (13, 16). Therefore, close  
80 attention is required in relation to the evolution of *Candida auris*.

81 Traditional identification techniques cannot be used to identify *Candida auris*. Therefore, the  
82 prevalence of *Candida auris* infections in the global population remains unknown. Furthermore,  
83 *Candida auris* has resulted in an “invisible pandemic” due to its broad nosocomial infection range  
84 (11). Thus, it is extremely important to comprehensively understand the characteristics of *Candida*  
85 *auris* itself along with the patients that the fungus infects. With this in mind, we collected papers  
86 from the last 10 years since the first report of *Candida auris* and extracted information pertaining  
87 to the patients’ age and gender, underlying disease, possible risk factors that may induce infection,  
88 genetic phenotype classification of *Candida auris* isolates, drug susceptibility information, and  
89 drug resistance loci. We compiled this information and conducted a statistical analysis to identify  
90 new infection-related characteristics. The mortality rate of *Candida auris* infection patients is an  
91 important factor that threatens global public health (4). Therefore, this study employed a  
92 conservative regression model to determine the effects of several factors on patient mortality. We  
93 believe that this analysis and summary of the relevant data will result in a greater public  
94 understanding of *Candida auris* infections, thereby enabling scientists to focus greater attention on  
95 the evolution of multidrug resistance in *Candida auris*.

96

97 **Methods**

98           **Case inclusion**

99           Authoritative literature search databases (PubMed and Web of Science) were used to conduct  
100 the literature search using the following search criteria: 1. Titles or abstracts containing the  
101 keyword *Candida auris*; 2. Time range with unlimited start date and an end date of 31 December  
102 2019. Three hundred and sixty-five papers were identified through the literature search.  
103 Experimental study papers were excluded while case reports were selected for the analysis. A total  
104 of 76 papers on *Candida auris* case reports were included; these reports involved nearly 4000  
105 patients (See Appendix 1).

106           The papers were organized and analyzed after case screening. Firstly, repeated cases were  
107 excluded: Suspected repetitive cases from the same year and country that were reported in some  
108 papers were excluded based on isolate number, detection time, and detection unit. Cases with  
109 incomplete information were excluded. As this study predominantly analyzed case characteristics,  
110 cases with incomplete information were excluded. The specific data of 542 detailed cases were  
111 included in the statistical analysis conducted as a part of this study.

112           **Data entry**

113           The following information required for analysis was inputted:

114           1. Paper information (combined with data from the US Centers for Disease Control)<sup>2</sup>:

115               (1) Country of publication; (2) Year of publication;

116           2. Patient information;

117               (1) Basic information of patients: including gender, age, and whether patient is a  
118 premature infant.

119 (2) Underlying diseases of the patient: including common systemic diseases such as  
120 hypertension, diabetes, and hyperlipidemia; comorbid infections such as AIDS, syphilis, and  
121 cytomegalovirus (CMV) infection; solid organ diseases were classified based on the site, such  
122 as kidney disease, lung disease, and brain disease.

123 (3) Risk factors that may induce *Candida auris* infection: including use of central venous  
124 catheter, use of broad-spectrum antibiotics, parenteral nutrition, and intensive care unit  
125 admission.

126 (4) Patient mortality status: whether patient died and cause of death.

127 3. Isolate information:

128 (1) Drug sensitivity information: minimum inhibitory concentration (MIC) of common  
129 antifungal drugs and drug resistance loci;

130 (2) Genetic classification: Different isolates were classified based on genetic polymorphisms  
131 into: South Asia (clade I), East Asia (clade II), South Africa (clade III), and South America (clade  
132 IV) (17).

133 In order to ensure the accuracy of analysis, each inputted dataset required review by at least 3  
134 members of the team before it was accepted. In this study, the Beijing Key Laboratory for  
135 Molecular Diagnostics of Infectious Diseases was deemed the leading site and it established a  
136 research team consisting of one clinician, two laboratory physicians, one medical mycology  
137 researcher, and one pharmacology researcher.

### 138 **Data organization and statistical analysis**

139 In this study, underlying diseases predominantly included 3 categories encompassing

140 systemic diseases, comorbid infection, and organ diseases; these were further divided into 50  
141 subcategories. Suspected patients were not included in the statistics.

142 In order to avoid the repetition of statistical analyses pertaining to drug sensitivity data, the  
143 most recent data for an isolate was used when the same method was employed to analyze more  
144 than one drug sensitivity experiment. Interestingly, the MIC values for the most recent results  
145 generated from drug sensitivity experiments in all papers were the highest. When the broth method  
146 and standard commercial reagents were both used for drug sensitivity experiments for the same  
147 isolate, the drug sensitivity results obtained using standard commercial reagents were chosen for  
148 analysis because operator error tended to occur when the broth method was used. When different  
149 standard commercial drug sensitivity test systems (VITEK®2 and Sensititre® YeastOne® were  
150 used in this study) were used for the same isolate, the test results from the VITEK®2 system were  
151 selected as the inter-laboratory consistency of VITEK®2 was higher than that for Sensititre®  
152 YeastOne® (18).

153 The mortality rate of *Candida auris* infection is an important factor that threatens global  
154 public health. Hence, in this study we felt that it was important to screen for factors that affected  
155 patient mortality. The  $\chi^2$  test was used to screen for single factors that might affect mortality. A  
156 p-value < 0.05 indicated that the suspected factor was significant. Significant suspected factors  
157 were included in multivariate analysis. If the number of significant suspected factors obtained  
158 during univariate analysis was less, the criteria for inclusion in the multivariate analysis were  
159 broadened to P < 0.1 (19, 20). For the multivariate analysis, we constructed a binary logistic  
160 regression model (21) to screen for independent influencing factors that affect the outcome (patient  
161 mortality). The outcome marker (death) was the dependent variable and all potential factors that  
162 affect patient mortality were independent variables. Potential factors that affect patient mortality



163 included: gender, age, underlying disease, and drug resistance of the isolate. For influencing  
164 factors obtained by univariate analysis, only those with a partial regression coefficient of  $P < 0.05$   
165 in regression model analysis could significantly affect the outcome marker (patient mortality)  
166 (21).

167

## 168 Results

### 169 Initial infection reports in different countries

170 Since 2009 when *Candida auris* was first isolated from an auditory canal of a patient in Japan,  
171 infections have also been reported in South Korea (22), India (23), South Africa (24), and Kuwait  
172 (25). After 2016, the number of countries with first reports of *Candida auris* infections started to  
173 increase. In 2018, 14 countries reported *Candida auris* infections for the first time, this was the  
174 highest number of countries reporting infection for the first time in 10 years (shown in Figure 1).

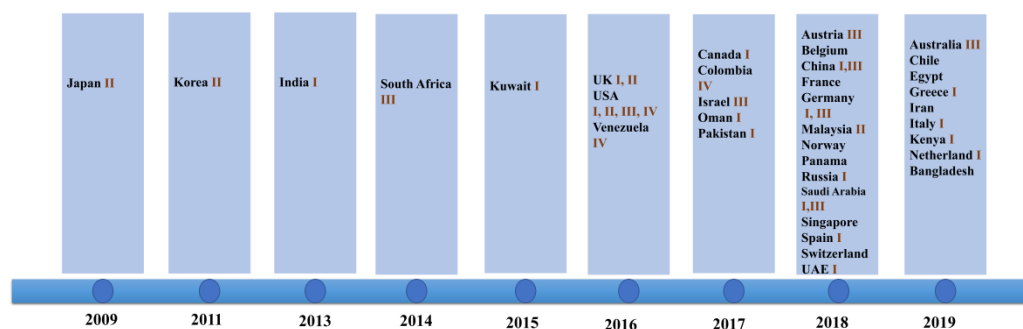

175

176 Figure 1: Date of first report and genetic classification for various countries (South Asia (clade I),  
177 East Asia (clade II), South Africa (clade III), and South America (clade IV))

178

### 179 Genetic classification of isolates detected in various countries

180 The isolates detected by various countries were classified by whole genome sequencing data  
181 into South Asia strains (clade I), East Asia strains (clade II), South Africa strains (clade III), and  
182 South America strains (clade IV). The South Asia strains (clade I) were the most prevalent (17  
183 countries), followed by the South Africa strains (clade III) which were observed in 8 countries.  
184 Only 4 and 3 countries reported the presence of the East Asia strains (clade II) and the South  
185 America strains (IV), respectively. Both South Asia and South Africa strains simultaneously  
186 occurred in China, Germany, UK, and Saudi Arabia. All 4 clades appeared in the US, a  
187 phenomenon that may be due to large population movements. In addition, an isolate identified in  
188 Iran in 2019 may represent a potential clade V strain (shown in Figure 1) (17).

#### 189 **Patient gender and age distribution**

190 For the included patients, gender was mentioned for 509 patients, of which 296 (58%) were  
191 male and 213 (42%) were females. The male to female ratio was around 3:2 and infection resulted  
192 in significant gender differences. This is shown in Figure 2a.

193 The World Health Organization age group classification criteria (20) were used to divide  
194 patients into children (0–18 years), adolescents (19–44 years), middle-aged (45–59 years), and  
195 elderly ( $\geq 60$  years). Figure 2b shows the age distribution of 195 cases in which age was mentioned.  
196 Most patients, approximately half of the population ( $n=93$ , 48%), were elderly. Fifteen of the  
197 patients were infants less than 1 month old; 10 of the 15 (2/3 of the infant population) patients were  
198 premature infants. Therefore, the possibility of *Candida auris* infection should be considered  
199 when premature infants present with infection symptoms due to unknown causes.

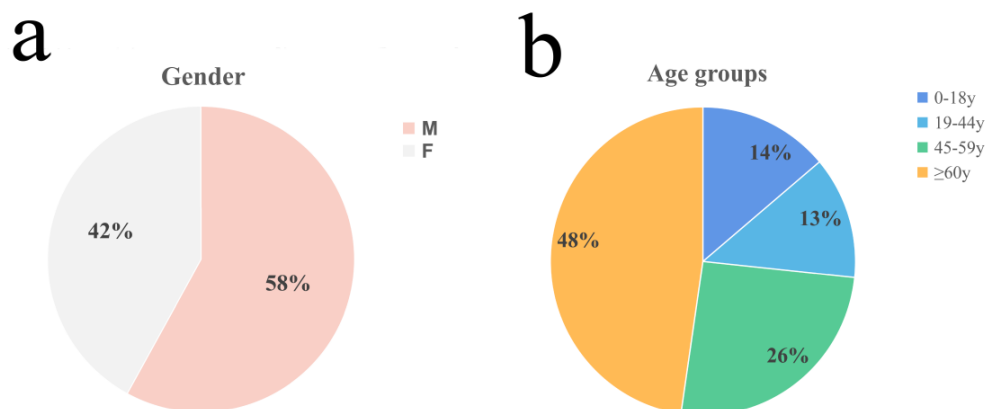

200  
201 Figure 2: Gender and age distribution of patients. a). Gender distribution: males (58%) and  
202 females (42%). b). Age distribution: 0–18 years (14%), 19–44 years (13%), 45–60 years (26%),  
203 ≥60 years (48%).

204

### 205 **Underlying disease and infected population**

206 Underlying diseases were mentioned for 418 patients, of which the highest proportion of  
207 underlying diseases were diabetes, kidney disease (some have diabetic nephropathy), and ear  
208 disease. In addition, 12 patients were co-infected with HIV (as shown in Table 1).

209 Table 1. Underlying diseases in *Candida auris*-infected patients

| Underlying disease | Number of people with disease | Proportion of patients |
|--------------------|-------------------------------|------------------------|
| Diabetes           | 88                            | 21%                    |
| Kidney disease     | 86                            | 21%                    |
| Ear disease        | 74                            | 18%                    |
| Trauma             | 63                            | 15%                    |
| Lung disease       | 46                            | 11%                    |

|                        |    |     |
|------------------------|----|-----|
| Tumor                  | 42 | 10% |
| Brain disease          | 41 | 10% |
| Sepsis                 | 39 | 9%  |
| Hypertension           | 37 | 9%  |
| Heart disease          | 24 | 6%  |
| Intestinal disease     | 18 | 4%  |
| Liver disease          | 15 | 4%  |
| Hematologic disease    | 12 | 3%  |
| HIV                    | 12 | 3%  |
| Vasculopathy           | 10 | 2%  |
| Thyroid disorder       | 7  | 2%  |
| Diarrhea               | 7  | 2%  |
| Pancreatic disease     | 4  | 1%  |
| Bone marrow disease    | 4  | 1%  |
| Urinary tract disease  | 4  | 1%  |
| Pressure ulcer         | 4  | 1%  |
| Nasopharyngeal disease | 3  | 1%  |
| Psychiatric disorder   | 3  | 1%  |
| Other diseases         | 33 | 8%  |

---

210 Note: Other diseases are underlying disease categories with proportion of patients <0.5%.

211

212 **Risk factors that may lead to infection and infected population**

213 Risk factors for infection were mentioned for 389 patients (Table 2). Greater than 60% of  
214 patients had an ICU treatment history and a history of broad-spectrum antibiotic use. These factors  
215 represent high risk factors for *Candida auris* infection and are consistent with the risk factors  
216 espoused by global experts in relation to *Candida auris* emergence and transmission (19,20).

217 Table 2: Risk factors involved in contact with *Candida auris* infected patients

| Risk factor                                                             | Number of patients | Proportion of patients |
|-------------------------------------------------------------------------|--------------------|------------------------|
| ICU                                                                     | 254                | 65%                    |
| Broad-spectrum antibiotic treatment                                     | 232                | 60%                    |
| Central venous catheter                                                 | 182                | 47%                    |
| Urinary catheter                                                        | 141                | 36%                    |
| Underwent surgery in last 30 days                                       | 115                | 30%                    |
| Treatment with antifungal drugs in last 30 days before testing positive | 104                | 27%                    |
| Mechanical ventilation                                                  | 60                 | 15%                    |
| Parenteral nutrition                                                    | 40                 | 10%                    |
| Steroid treatment                                                       | 35                 | 9%                     |
| Immunosuppressant                                                       | 28                 | 7%                     |
| Neutropenia                                                             | 11                 | 3%                     |
| Blood transfusion                                                       | 4                  | 1%                     |

218

219

220 **Drug-resistant *Candida auris* strains**

221 Large differences in efficacy were observed for antifungal drugs in relation to the treatment of  
222 infection of different *Candida auris* isolates (13). The US Centers for Disease Control (CDC)  
223 defined conservative break points to determine whether *Candida auris* is resistant to antifungals:  
224 fluconazole (FLC): 32 µg/mL, amphotericin B (AMB): 2 µg/mL, micafungin (MFG): 4 µg/mL,  
225 and caspofungin (CAS): 2 µg/mL (2). In another study by the US CDC, break points for  
226 voriconazole (VRC): 2 µg/mL, anidulafungin (AFG): 4 µg/mL, and flucytosine (5-FC):128  
227 µg/mL were established. A MIC < cutoff was defined as sensitive while a MIC ≥ cutoff was  
228 defined as resistant (25). Among the isolates that were included in the analysis, drug resistance  
229 information was available for 323 isolates; the proportion of isolates exhibiting FLC resistance  
230 was the highest (72%), while isolates exhibiting AMB (27%) and VRC (25%) resistance were the  
231 second and third most prevalent, respectively (Figure 3a). Among the VRC-resistant isolates, 18  
232 Venezuelan isolates reported by Calvo et al. (7) and 8 USA isolates reported by Park et al (27).  
233 were completely resistant to VRC.

234 MIC information was accessible for 118 isolates in the literature and this information was  
235 used to determine drug resistance (Figure 3b). Among these isolates, 17 isolates (14%) were  
236 sensitive, 45 isolates (38%) were resistant to one antifungal, 36 isolates (31%) were resistant to  
237 two antifungals, 19 isolates (16%) were resistant to three antifungals, and 1 isolates (1%) was  
238 resistant to five antifungals. An analysis of these data revealed that there was no statistical  
239 correlation between the degree of multidrug resistance in *Candida auris* and patient mortality  
240 (Table 3). It should be noted that sensitive ones were isolated from 5 dead patients and the only  
241 sensitive isolate was from only a surviving patient. Only one isolate was resistant to 5 drugs (FLC,  
242 VRC, ITC, AMB, and CAS) and this isolate was obtained from a dead patient from Malaysia.  
243 Currently, echinocandin is the only first-line drug for *Candida auris* infection (14,15). When

244 echinocandin resistance is present in the patient, the outcome is always death.

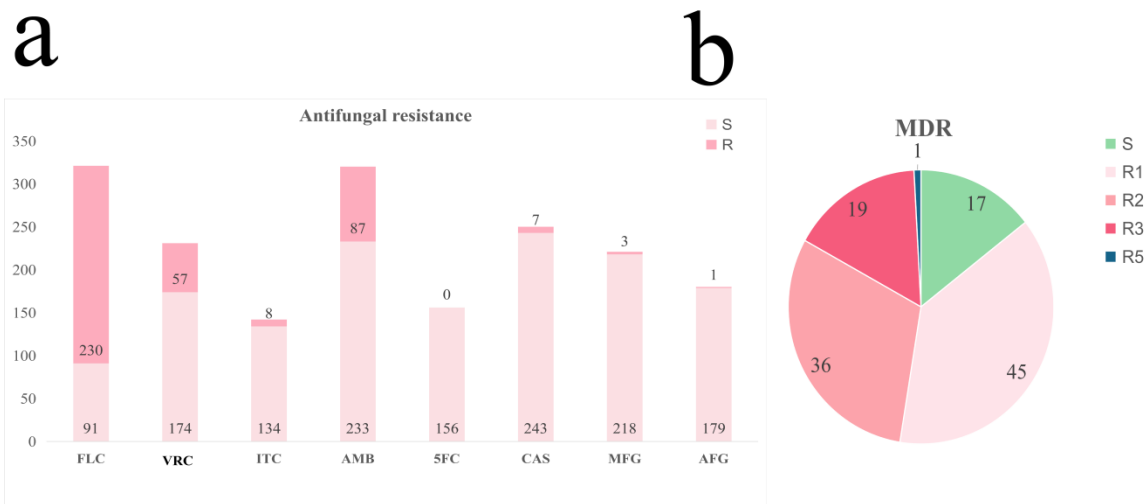

245  
246 Figure 3: Drug resistance of *Candida auris*. a). Drug resistance status of *Candida auris* against 8  
247 common antifungals. b). Drug resistance status of *Candida auris* isolates. MDR: multi-drug  
248 resistance. S: sensitive, R1-R5: drug resistance status

### 250 Drug resistance loci

251 Among the isolates reported to date, the major drug resistance loci for azoles are ERG11,  
252 CDR1, and MDR1 (27,28,29); the major drug resistance loci for AMB are ERG 2, 3, 5, 6, or 11  
253 (30); and the major drug resistance locus for echinocandin is FKS11 (31,32). As part of a  
254 mechanistic analysis of drug resistance towards 5FC, Rhodes et al (16). sequenced the entire  
255 genome of 5FC-resistant *Candida auris* and found an amino acid substitution in F211I in the  
256 FUR1 gene. However, further studies are required to determine whether this FUR1 mutation is the  
257 cause of 5FC resistance in *Candida auris* (16).

### 258 Mortality rate

259 A total of 218 cases reported whether patients died or survived upon discharge. Among the  
260 latter cases, 97 died and the mortality rate was 44%. Gender information was available for 88 dead  
261 patients, of which 29 out of 53 males died and the mortality rate was 53%; 14 out of 35 females  
262 died and the associated mortality rate was 40%; the mortality rate for males was slightly higher.  
263 Major causes of death that were mentioned included sepsis, septic shock, and multiorgan failure.

#### 264 **Influencing factor for mortality**

265 Among the patients included in the analyzed cases, the underlying disease of 100 patients  
266 corresponded to pre-discharge mortality and could be included in the analysis (in addition, many  
267 papers compiled patients' information so that information could not be pertaining to each  
268 individual patient, which could not be included in the analysis). Gender, age, underlying disease,  
269 and drug resistance of isolates were used to screen for factors that affect mortality to discover  
270 influencing factors for mortality. The types of underlying diseases in dead and surviving patients  
271 were similar. First, the  $\chi^2$  test was used to screen for single factors that may affect patient mortality  
272 by category (shown in Table 3). Among the factors screened, kidney disease had a  $P < 0.05$  and was  
273 analyzed by multivariate analysis. As the number of factors with  $P < 0.05$  was low, the inclusion  
274 criteria were relaxed to  $P < 0.1$  and tumor ( $P = 0.076$ ) was included in multivariate analysis as a  
275 suspected influencing factor (19,20).

276 Table 3:  $\chi^2$  test screening of single factors that may affect patient mortality by category

| Influencing factor |        | Death toll | Number of survivors | P-value |
|--------------------|--------|------------|---------------------|---------|
| Gender             | Male   | 29         | 24                  | 0.176   |
|                    | Female | 14         | 21                  |         |



|                    |         |    |    |       |
|--------------------|---------|----|----|-------|
| Sepsis             | Absent  | 38 | 41 | 0.727 |
|                    | Present | 11 | 10 |       |
| Fever              | Absent  | 41 | 45 | 0.511 |
|                    | Present | 8  | 6  |       |
| Ear disease        | Absent  | 49 | 50 | 0.325 |
|                    | Present | 0  | 1  |       |
| Diabetes           | Absent  | 36 | 34 | 0.458 |
|                    | Present | 13 | 17 |       |
| Hypoglycemia       | Absent  | 49 | 50 | 0.325 |
|                    | Present | 0  | 1  |       |
| Hypertension       | Absent  | 43 | 41 | 0.315 |
|                    | Present | 6  | 10 |       |
| Hyperlipidemia     | Absent  | 47 | 50 | 0.965 |
|                    | Present | 1  | 1  |       |
| Lung disease       | Absent  | 33 | 38 | 0.43  |
|                    | Present | 16 | 13 |       |
| Tracheal disease   | Absent  | 47 | 50 | 0.534 |
|                    | Present | 2  | 1  |       |
| Intestinal disease | Absent  | 42 | 46 | 0.491 |
|                    | Present | 7  | 5  |       |
| Brain disease      | Absent  | 37 | 38 | 0.908 |
|                    | Present | 12 | 13 |       |

|                        |         |    |    |              |
|------------------------|---------|----|----|--------------|
| Kidney disease         | Absent  | 31 | 41 | <b>0.048</b> |
|                        | Present | 18 | 10 |              |
| Liver disease          | Absent  | 46 | 49 | 0.614        |
|                        | Present | 3  | 2  |              |
| Gallbladder disease    | Absent  | 48 | 50 | 0.977        |
|                        | Present | 1  | 1  |              |
| Tumor                  | Absent  | 34 | 43 | <b>0.076</b> |
|                        | Present | 15 | 8  |              |
| Chemotherapy           | Absent  | 46 | 50 | 0.288        |
|                        | Present | 3  | 1  |              |
| Radiotherapy           | Absent  | 48 | 51 | 0.305        |
|                        | Present | 1  | 0  |              |
| Nasopharyngeal disease | Absent  | 47 | 51 | 0.145        |
|                        | Present | 2  | 0  |              |
| Laryngeal disease      | Absent  | 48 | 51 | 0.305        |
|                        | Present | 1  | 0  |              |
| Hematologic disease    | Absent  | 43 | 46 | 0.697        |
|                        | Present | 6  | 5  |              |
| Heart disease          | Absent  | 39 | 43 | 0.539        |
|                        | Present | 10 | 8  |              |
| Neuropathy             | Absent  | 48 | 51 | 0.305        |
|                        | Present | 1  | 0  |              |

|                                          |         |    |    |       |
|------------------------------------------|---------|----|----|-------|
| Diseases of the ovary                    | Absent  | 49 | 50 | 0.325 |
|                                          | Present | 0  | 1  |       |
| Vasculopathy                             | Absent  | 46 | 45 | 0.324 |
|                                          | Present | 3  | 6  |       |
| Abnormal coagulation function            | Absent  | 49 | 50 | 0.325 |
|                                          | Present | 0  | 1  |       |
| Thyroid disorder                         | Absent  | 47 | 50 | 0.534 |
|                                          | Present | 2  | 1  |       |
| Drug abuse                               | Absent  | 49 | 50 | 0.325 |
|                                          | Present | 0  | 1  |       |
| Acquired immunodeficiency syndrome (AID) | Absent  | 47 | 49 | 0.967 |
|                                          | Present | 2  | 2  |       |
| Bone marrow disease                      | Absent  | 47 | 49 | 0.967 |
|                                          | Present | 2  | 2  |       |
| Oral disease                             | Absent  | 49 | 50 | 0.325 |
|                                          | Present | 0  | 1  |       |
| Urinary tract disease                    | Absent  | 47 | 49 | 0.967 |
|                                          | Present | 2  | 2  |       |
| Endometrial disease                      | Absent  | 49 | 50 | 0.325 |
|                                          | Present | 0  | 1  |       |
| Cytomegalovirus (CMV)                    | Absent  | 48 | 51 | 0.305 |
|                                          | Present | 1  | 0  |       |

|                      |           |    |    |       |
|----------------------|-----------|----|----|-------|
| Psychiatric disorder | Absent    | 48 | 49 | 0.582 |
|                      | Present   | 1  | 2  |       |
| Psoriasis            | Absent    | 48 | 51 | 0.305 |
|                      | Present   | 1  | 0  |       |
| Pressure ulcer       | Absent    | 47 | 49 | 0.967 |
|                      | Present   | 2  | 2  |       |
| Asthma               | Absent    | 48 | 51 | 0.305 |
|                      | Present   | 1  | 0  |       |
| Adrenal glands       | Absent    | 49 | 50 | 0.325 |
|                      | Present   | 0  | 1  |       |
| Prostate gland       | Absent    | 48 | 51 | 0.305 |
|                      | Present   | 1  | 0  |       |
| Breasts              | Absent    | 49 | 50 | 0.325 |
|                      | Present   | 0  | 1  |       |
| Bones                | Absent    | 48 | 50 | 0.977 |
|                      | Present   | 1  | 1  |       |
| Trauma               | Absent    | 45 | 49 | 0.372 |
|                      | Present   | 4  | 2  |       |
| Resistant            | Sensitive | 5  | 1  | 0.399 |
|                      | 1 type    | 5  | 6  |       |
|                      | 2 types   | 8  | 10 |       |
|                      | 3 type    | 5  | 6  |       |

|       |         |                  |                     |       |
|-------|---------|------------------|---------------------|-------|
|       | 5 types | 1                | 0                   |       |
| Age # |         | 64 (45.50–73.35) | 53.50<br>(39.75–72) | 0.187 |

277 Note: # Non-normal distribution after normality test was carried out and expressed as median  
 278 (interquartile range). P<0.1: Significant

279

280 Two suspected influencing factors (kidney disease and tumor) were selected based on the  
 281 aforementioned univariate analysis and used for multivariate analysis. The outcome marker  
 282 (mortality/survival) was used as a dependent variable and kidney disease and tumor were used as  
 283 independent variables for logistic regression analysis (Table 4).

284 Table 4: Multivariate analysis results

|                        | B      | Standard error | Wald statistic | Degrees of freedom | Significance | OR    | 95%: confidence interval of OR |             |
|------------------------|--------|----------------|----------------|--------------------|--------------|-------|--------------------------------|-------------|
|                        |        |                |                |                    |              |       | Lower limit                    | Upper limit |
| Kidney disease Present | -1.135 | 0.484          | 5.505          | 1                  | 0.019        | 0.321 | 0.124                          | 0.829       |
| Kidney disease Absent  | 0      |                |                |                    |              | 1     |                                |             |
| Tumor Present          | -1.156 | 0.519          | 4.962          | 1                  | 0.026        | 0.315 | 0.114                          | 0.870       |
| Tumor Absent           | 0      |                |                |                    |              | 1     |                                |             |
| Constant               | 1.643  | 0.628          | 6.847          | 1                  | 0.009        | 5.172 |                                |             |

285 Note: B: regression coefficient; OR: odds ratio.

286

287 The following conclusions were ultimately drawn from the multivariate analysis:

288 1. Kidney disease is an independent influencing factor for the outcome marker ( $P=0.019<0.05$ )  
289 and the number of surviving patients with kidney disease was 32.1% of those without kidney  
290 disease. 2. Tumor is an independent influencing factor for the outcome marker ( $P=0.026<0.05$ )  
291 and the number of surviving patients with tumor is 31.5% of those without.

292 Based on the above conclusions, we selected kidney disease and tumor for prediction of  
293 patient outcomes and the prediction accuracy rate was 65.7%. The accuracy rate was deemed  
294 appropriate and the aforementioned conclusion had a good practical application value when the  
295 prediction accuracy rate was  $>60\%$  (33).

296

## 297 **Discussion**

298 *Candida auris* is an emerging pathogen and there is currently only a limited understanding of  
299 the mechanisms and influencing factors that underpin associated infections. Hence, further studies  
300 are required to help scientists better understand this pathogen. During the early stages of  
301 emergence of a pathogen, information release along with medical and public health awareness are  
302 extremely important.

303 In this analysis of collected literature, incomplete information was available for many  
304 patients. The main reason for these gaps in information relate to the fact that *Candida auris*  
305 isolates from these patients were not isolated during hospitalization but a few years later by public  
306 health institutions and research institutions during retrospective screening of samples.  
307 Furthermore, although *Candida auris* is difficult to culture many medical institutions still rely on  
308 culture to identify microorganisms (34). In addition, *Candida auris* is closely related to *Candida*  
309 *haemulonii* and *Candida pseudohaemulonii*. These three fungi are extremely close in phylogeny  
310 and it is difficult to distinguish them by phenotype. Thus, traditional identification methods such

311 as Vitek 2 and API 20CAUX tend to wrongly identify *Candida auris* as these two closest  
312 relatives.<sup>12</sup> Although the development of matrix-assisted laser desorption/ionization time-of-flight  
313 mass spectrometry (MALDI-TOF MS) (35) and sequencing (36) strategies have helped in the  
314 rapid and accurate diagnosis of *Candida auris*, most parts of the world do not have the  
315 infrastructure to carry out these techniques. In addition, it is likely that there is a large volume of  
316 unpublished data pertaining to *Candida auris* infections and the number of infected patients may  
317 be far higher than that reported in the literature. Therefore, this is an “invisible pandemic”.

318 In this retrospective analysis, we found that the male to female ratio for patients was nearly  
319 3:2 and mortality data revealed that the male to female ratio for mortality was close to 4:3. Similar  
320 ratios have not been reported for other *Candida* infections (37). The proportion of *Candida auris*  
321 patients with diabetes, kidney disease, and ear disease is higher than that reported for other  
322 *Candida* infections. Diabetes is also a susceptibility factor for other candidiasis infections (20) but  
323 the high infection rates observed for kidney disease and ear disease are specific for *Candida auris*.  
324 Currently, almost all reported cases were from hospital wards. Jung et al. (21) reported that 78 out  
325 of 79 *Candida auris* infection patients had a history of consultation with the otolaryngology  
326 department; among these patients, 69 had ear disease and their symptoms were relatively mild.  
327 Therefore, otolaryngology outpatient departments should be highly vigilant for *Candida auris*  
328 infections. Among the *Candida auris* patient population, 21% had kidney disease; most of the  
329 latter patients had chronic kidney disease or nephrotic syndrome. More importantly, kidney  
330 disease is also an independent influencing factor that affects mortality in *Candida auris* infection  
331 patients. Therefore, nephrologists should be extremely vigilant for *Candida auris* infection. As the  
332 high infection rate in kidney disease patients is specific to *Candida auris* compared with other  
333 *Candida* species, nephrologists in many regions do not have high awareness for *Candida auris*

334 infection. Many nephrologists do not completely understand *Candida auris*. Therefore, it is  
335 important that *Candida auris*-related information be disseminated to various medical units,  
336 particularly nephrology departments which can be extremely important in the early diagnosis of  
337 *Candida auris* infections. In addition, many *Candida auris* patients exhibit severe symptoms and  
338 although ICUs have been a focus of attention since *Candida auris* was first reported, overall  
339 vigilance in ICUs is still not very strong and there is a need to strengthen knowledge gaps  
340 pertaining to prevention, diagnosis, and treatment knowledge.

341 FLC exhibits broad-spectrum antifungal activity, good efficacy, a low incidence of adverse  
342 reactions, and appropriate plasma concentrations for long durations (38). Therefore, this drug is  
343 the most frequently utilized empirical therapy in patients suspected of fungal infection. *Candida*  
344 *auris* has a high FLC resistance rate and the overall drug resistance ratio has been as high as 72%  
345 over the last 10 years. Thus, FLC is not recommended as an empiric drug therapy when treatment  
346 is urgent and drug sensitivity results have yet to be released for patients who either have been  
347 infected with *Candida auris* or are suspected to have been infected with *Candida auris*. Clinicians  
348 need to develop an awareness when considering whether FLC should be used as empiric therapy in  
349 patients.

350 Although the data generated by this study reveal that there is no overall statistical correlation  
351 between the degree of multidrug resistance in *Candida auris* and patient mortality, we did identify  
352 some areas for attention after an in-depth analysis. Among the isolates for which patient mortality  
353 could be determined, sensitive ones were isolated from 5 dead patients and the only sensitive  
354 isolate was from only a surviving patient. We analyzed the possible reasons for the death of  
355 information pertaining to isolates causing mortality and speculated that virulence and mortality  
356 rates are higher when the *Candida auris* isolate is sensitive (39, 40). However, because sensitive



357 isolates can be treated with antibiotics, clinical outcomes can be changed if the patients are  
358 diagnosed early and treated in a timely manner. Because candidiasis patients do not have apparent  
359 clinical characteristics at an early stage, early laboratory tests are key to reducing the mortality rate  
360 (11). Most Venezuelan and US patients exhibited VRC resistance. As these two countries are in the  
361 Americas, this phenomenon suggests that there is a relationship between antifungal treatment  
362 habits in different regions in the world.

363 In addition, among the acquired data, only one isolate that was resistant to 5 drugs was  
364 obtained and this was isolated from a Malaysian patient where the outcome was death. Therefore,  
365 when multidrug resistance in *Candida auris* gradually evolves, there will be situations where  
366 patients cannot be treated by drugs and death will result. However, because the outcome for  
367 patients infected with strains exhibiting only echinocandin resistance is death, vigilance is still  
368 required for instances where the fungi isolated from patients do not show severe drug resistance  
369 (e.g. resistance to 5 drugs). Echinocandin is currently the recommended treatment for *Candida*  
370 *auris*. However, if *Candida auris* gradually evolves, more and more strains will develop  
371 echinocandin resistance and this may lead to an increase in the mortality rate of patients with  
372 *Candida auris* infections. Although the  $\beta$ -glucan synthesis inhibitor SCY-078 (41) and other new  
373 drugs have shown some promise, they have not been widely used in clinical practice. Therefore, it  
374 is especially important to develop new drugs to combat high levels of echinocandin resistance. The  
375 appearance of antifungal drug resistance and the associated global range will continuously  
376 threaten global public health (42) and cannot be ignored.

377 There are some limitations pertaining to this study. As this is a retrospective analysis of  
378 published studies, there may be some original studies where the authors believed the associated  
379 conditions were not important and some of the influencing factors were not mentioned. Thus, these

380 papers were not included in this current analysis. The stability of the drug sensitivity results from  
381 different locations may vary. However, this study is the largest retrospective analysis of *Candida*  
382 *auris* literature containing case data thus far. Additionally, as there was only a limited number of  
383 patients with certain diseases, there might be a selection bias in this study.

384

### 385 **Conclusion**

386 This retrospective analysis provides us with a greater understanding of *Candida auris* along  
387 with some of the main characteristics associated with *Candida auris*-infected patients. For  
388 instance, the majority of the patients were male and had kidney disease or ear disease. It was also  
389 observed that kidney disease can affect patient mortality in infected individuals. In addition, an  
390 ever increasing number of multidrug resistant isolates have been identified and we should be  
391 vigilant in relation to the evolution of drug resistance in *Candida auris*. Moreover, it is important  
392 that we comprehensively improve diagnosis and treatment awareness for *Candida auris*.  
393 Furthermore, we should actively develop early diagnostic techniques along with safe and effective  
394 drugs for the treatment of *Candida auris* infections.

395

### 396 **Acknowledgements:**

397 This research was supported by Ministry of science and technology of the People's Republic of  
398 China (2018ZX10101003 and 2018ZX10712-001), Jiangsu Provincial Medical Talent  
399 (ZDRCA2016053), Six talent peaks project of Jiangsu Province (WSN-135)

400

401 **Conflict of interest:** The authors declare that they have no conflicts of interest.

402 **Research involving human participants and/or animals:** Not applicable.

403 **Informed consent:** Not applicable.

404 **References**

- 405 1. Satoh K, Makimura K, Hasumi Y, Nishiyama Y, Uchida K, Yamaguchi H. 2009. *Candida*  
406 *auris* sp. nov., a novel ascomycetous yeast isolated from the external ear canal of an  
407 inpatient in a Japanese hospital. *Microbiol Immunol* 53:41-44.
- 408 2. Fungal Diseases. Centers for Disease Control and Prevention. *Candida auris*. 5 May 2020.  
409 <https://www.cdc.gov/fungal/candida-auris/index.html>.
- 410 3. The New York Times. 6 April 2019. A Mystery Infection, Spanning the Globe in a  
411 Climate of Secrecy. <https://www.nytimes.com>.
- 412 4. Meis JF, Chowdhary A. 2018. *Candida auris*: a global fungal public health threat. *Lancet*  
413 *Infect Dis* 18:1298-1299.
- 414 5. Rhodes J, Fisher MC. 2019. Global epidemiology of emerging *Candida auris*. *Curr Opin*  
415 *Microbiol* 52:84-89.
- 416 6. Biswal M, Rudramurthy SM, Jain N, Shamanth AS, Sharma D, Jain K, Yaddanapudi LN,  
417 Chakrabarti A. 2017. Controlling a possible outbreak of *Candida auris* infection: lessons  
418 learnt from multiple interventions. *J Hosp Infect* 97:363-370.
- 419 7. Calvo B, Melo ASDA, Perozomena A, Hernandez M, Francisco EC, Hagen F, Meis JF,  
420 Colombo AL. 2016. First report of *Candida auris* in America: Clinical and microbiological  
421 aspects of 18 episodes of candidemia. *J Infect* 73:369-374.
- 422 8. Ku TSN, Walraven CJ, Lee SA. 2018. *Candida auris*: Disinfectants and Implications for  
423 Infection Control. *Front Microbiol* 9.
- 424 9. Madder H, Moir I, Moroney R, Butcher L, Newnham R, Sunderland M, Clarke T, Foster D,  
425 Hoffman P, Moore G. 2017. Multiuse patient monitoring equipment as a risk factor for  
426 acquisition of *Candida auris*. [bioRxiv:149054](https://doi.org/10.1101/149054).
- 427 10. Cortegiani A, Misseri G, Giarratano A, Bassetti M, Eyre DW. 2019. The global challenge of  
428 *Candida auris* in the intensive care unit. *Critical Care* 23:150.
- 429 11. Jefferysmith A, Taori SK, Schelenz S, Jeffery K, Johnson EM, Borman AM, Manuel R,  
430 Brown CS. 2017. *Candida auris*: a Review of the Literature. *Clin Microbiol Rev* 31.
- 431 12. Shallu K, K. SP, Cheshta S, Anupam P, Aradhana M, Anil K, F. MJ, Anuradha C. 2015.

- 432 Multidrug-Resistant *Candida auris* Misidentified as *Candida haemulonii* : Characterization  
433 by Matrix-Assisted Laser Desorption Ionization–Time of Flight Mass Spectrometry and  
434 DNA Sequencing and Its Antifungal Susceptibility Profile Variability by Vitek 2, CLSI  
435 Broth Microdilution, and Etest Method. J Clin Microbiol 53.
- 436 13. Chowdhary A, Sharma C, Meis JF. 2017. *Candida auris*: A rapidly emerging cause of  
437 hospital-acquired multidrug-resistant fungal infections globally. PLoS Pathog 13:1006290.
- 438 14. Chowdhary A, Voss A, Meis JF. 2016. Multidrug resistant *Candida auris*: New kid on the  
439 block in hospital associated infections? J Hosp Infect:S0195670116303188.
- 440 15. Kim Hutchings Uke. 23 April 2018. *Candida auris* in healthcare settings – Europe.  
441 [https://www.ecdc.europa.eu/sites/portal/files/documents/RRA-Candida-auris-European-U](https://www.ecdc.europa.eu/sites/portal/files/documents/RRA-Candida-auris-European-Union-countries.pdf)  
442 [nion-countries.pdf](https://www.ecdc.europa.eu/sites/portal/files/documents/RRA-Candida-auris-European-Union-countries.pdf).
- 443 16. Rhodes J, Abdolrasouli A, Farrer RA, Cuomo CA, Aanensen DM, Armstrongjames D,  
444 Fisher MC, Schelenz S. 2018. Genomic epidemiology of the UK outbreak of the emerging  
445 human fungal pathogen *Candida auris*. Emerging microbes & infections 7:43.
- 446 17. Chow NA, De Groot T, Badali H, Abastabar M, Chiller T, Meis JF. 2019. Potential Fifth  
447 Clade of *Candida auris*, Iran, 2018. Emerg Infect Dis 25:1780-1781.
- 448 18. Farina C, Manso E, Andreoni S, Conte M, Fazii P, Lombardi G, Sanna S, Russello G. 2011.  
449 Interlaboratory evaluation of VITEK2 system and Sensititre YeastOne® for antifungal  
450 susceptibility testing of yeasts isolated from blood cultures against four antifungal agents.  
451 New Microbiol 34:195-201.
- 452 19. Brookhart MA, Schneeweiss S, Rothman KJ, Glynn RJ, Avorn J, Sturmer T. 2006. Variable  
453 selection for propensity score models. Am J Epidemiol 163:1149-1156.
- 454 20. Jr DWH, Lemeshow S, Sturdivant RX. 2013. Applied Logistic Regression, 3rd Edition.
- 455 21. Mejiachew C, Ohalloran JA, Olsen MA, Stwalley D, Kronen R, Lin C, Salazar AS, Larson  
456 L, Hsueh K, Powderly WG. 2019. Effect of infectious disease consultation on mortality  
457 and treatment of patients with candida bloodstream infections: a retrospective, cohort study.  
458 Lancet Infect Dis 19:1336-1344.
- 459 22. Oh BJ, Shin JH, Kim M, Sung H, Lee K, Joo MY, Shin MG, Suh S, Ryang DW. 2011.  
460 Biofilm formation and genotyping of *Candida haemulonii*, *Candida pseudohaemulonii*,  
461 and a proposed new species (*Candida auris*) isolates from Korea. Med Mycol 49:98-102.

- 462 23. Chowdhary A, Sharma C, Duggal S, Agarwal K, Prakash A, Singh PK, Jain S, Kathuria S,  
463 Randhawa HS, Hagen F. 2013. New Clonal Strain of *Candida auris*, Delhi, India. Emerg  
464 Infect Dis 19:1670-1673.
- 465 24. Magobo RE, Corcoran C, Seetharam S, Govender NP. 2014. *Candida auris*-associated  
466 candidemia, South Africa. Emerg Infect Dis 20:1250-1251.
- 467 25. Emara M, Ahmad S, Khan Z, Joseph L, Alobaid I, Purohit P, Bafna R. 2015. *Candida auris*  
468 Candidemia in Kuwait, 2014. Emerg Infect Dis 21:1091-1092.
- 469 26. Lockhart SR, Etienne KA, Vallabhaneni S, Farooqi J, Chowdhary A, Govender NP,  
470 Colombo AL, Calvo B, Cuomo CA, Desjardins CA. 2017. Simultaneous Emergence of  
471 Multidrug-Resistant *Candida auris* on 3 Continents Confirmed by Whole-Genome  
472 Sequencing and Epidemiological Analyses. Clin Infect Dis 64:134-140.
- 473 27. Park JY, Bradley N, Brooks SE, Burney S, Wassner C. 2019. Management of Patients with  
474 *Candida auris* Fungemia at Community Hospital, Brooklyn, New York, USA, 2016-2018.1.  
475 Emerg Infect Dis 25:601-602.
- 476 28. Healey KR, Kordalewska M, Ortigosa CJ, Singh AK, Berrio I, Chowdhary A, Perlin DS.  
477 2018. Limited ERG11 Mutations Identified in Isolates of *Candida auris* Directly  
478 Contribute to Reduced Azole Susceptibility. Antimicrob Agents Chemother 62.
- 479 29. Rybak JM, Doorley LA, Nishimoto AT, Barker KS, Palmer GE, Rogers PD. 2019.  
480 Abrogation of Triazole Resistance upon Deletion of CDR1 in a Clinical Isolate of *Candida*  
481 *auris*. Antimicrob Agents Chemother 63.
- 482 30. Kordalewska M, Lee A, Park S, Berrio I, Chowdhary A, Zhao Y, Perlin DS. 2018.  
483 Understanding Echinocandin Resistance in the Emerging Pathogen *Candida auris*.  
484 Antimicrob Agents Chemother 62.
- 485 31. Hou X, Lee A, Jimenezortigosa C, Kordalewska M, Perlin DS, Zhao Y. 2018. Rapid  
486 Detection of ERG11-Associated Azole Resistance and FKS-Associated Echinocandin  
487 Resistance in *Candida auris*. Antimicrob Agents Chemother 63.
- 488 32. Chowdhary A, Prakash A, Sharma C, Kordalewska M, Kumar A, Sarma S, Tarai B, Singh  
489 A, Upadhyaya G, Upadhyay SH. 2018. A multicentre study of antifungal susceptibility  
490 patterns among 350 *Candida auris* isolates (2009–17) in India: role of the ERG11 and  
491 FKS1 genes in azole and echinocandin resistance. J Antimicrob Chemother 73:891-899.
- 492 33. Palazonbru A, Tomasrodriguez MI, Lopezcascales MT, La Rosa DMF, Gilguillen VF. 2017.

- 493           Multivariate ordered logistic regression models: dealing with the model-building strategy. J  
494           Pediatr Adolesc Gynecol 30:664.
- 495   34.   Navalkele B, Revankar SG, Chandrasekar PH. 2017. *Candida auris*: a worrisome, globally  
496           emerging pathogen. Expert Rev Anti Infect Ther 15:819-827.
- 497   35.   Vatanshenassan M, Boekhout T, Meis JF, Berman J, Chowdhary A, Benami R, Sparbier K,  
498           Kostrzewa M. 2019. *Candida auris* Identification and Rapid Antifungal Susceptibility  
499           Testing Against Echinocandins by MALDI-TOF MS. Frontiers in Cellular and Infection  
500           Microbiology 9:20.
- 501   36.   Munoz JF, Gade L, Chow NA, Loparev VN, Juieng P, Berkow EL, Farrer RA, Litvintseva  
502           AP, Cuomo CA. 2018. Genomic insights into multidrug-resistance, mating and virulence in  
503           *Candida auris* and related emerging species. Nature Communications 9:5346.
- 504   37.   Kohler JR, Hube B, Puccia R, Casadevall A, Perfect JR. 2017. Fungi that Infect Humans.  
505           Microbiology spectrum 5:813-843.
- 506   38.   Agrawal P B, Narang A, Kumar P. 1996. Fluconazole. Indian J Pediatr 63:775-780.
- 507   39.   Lara HH, Ixtepanturrent L, Yacaman MJ, Lopezribot JL. 2020. Inhibition of *Candida auris*  
508           Biofilm Formation on Medical and Environmental Surfaces by Silver Nanoparticles. ACS  
509           Applied Materials & Interfaces.
- 510   40.   Tan J, Liu Z, Sun Y, Yang L, Gao L. 2019. Inhibitory Effects of Photodynamic Inactivation  
511           on Planktonic Cells and Biofilms of *Candida auris*. Mycopathologia 184:525-531.
- 512   41.   Larkin EL, Hager C, Chandra J, Mukherjee PK, Retuerto M, Salem I, Long L, Isham N,  
513           Kovanda LL, Borrotoesoda K. 2017. The Emerging Pathogen *Candida auris*: Growth  
514           Phenotype, Virulence Factors, Activity of Antifungals, and Effect of SCY-078, a Novel  
515           Glucan Synthesis Inhibitor, on Growth Morphology and Biofilm Formation. Antimicrob  
516           Agents Chemother 61.
- 517   42.   Fisher MC, Hawkins NJ, Sanglard D, Gurr SJ. 2018. Worldwide emergence of resistance to  
518           antifungal drugs challenges human health and food security. Science 360:739-742.

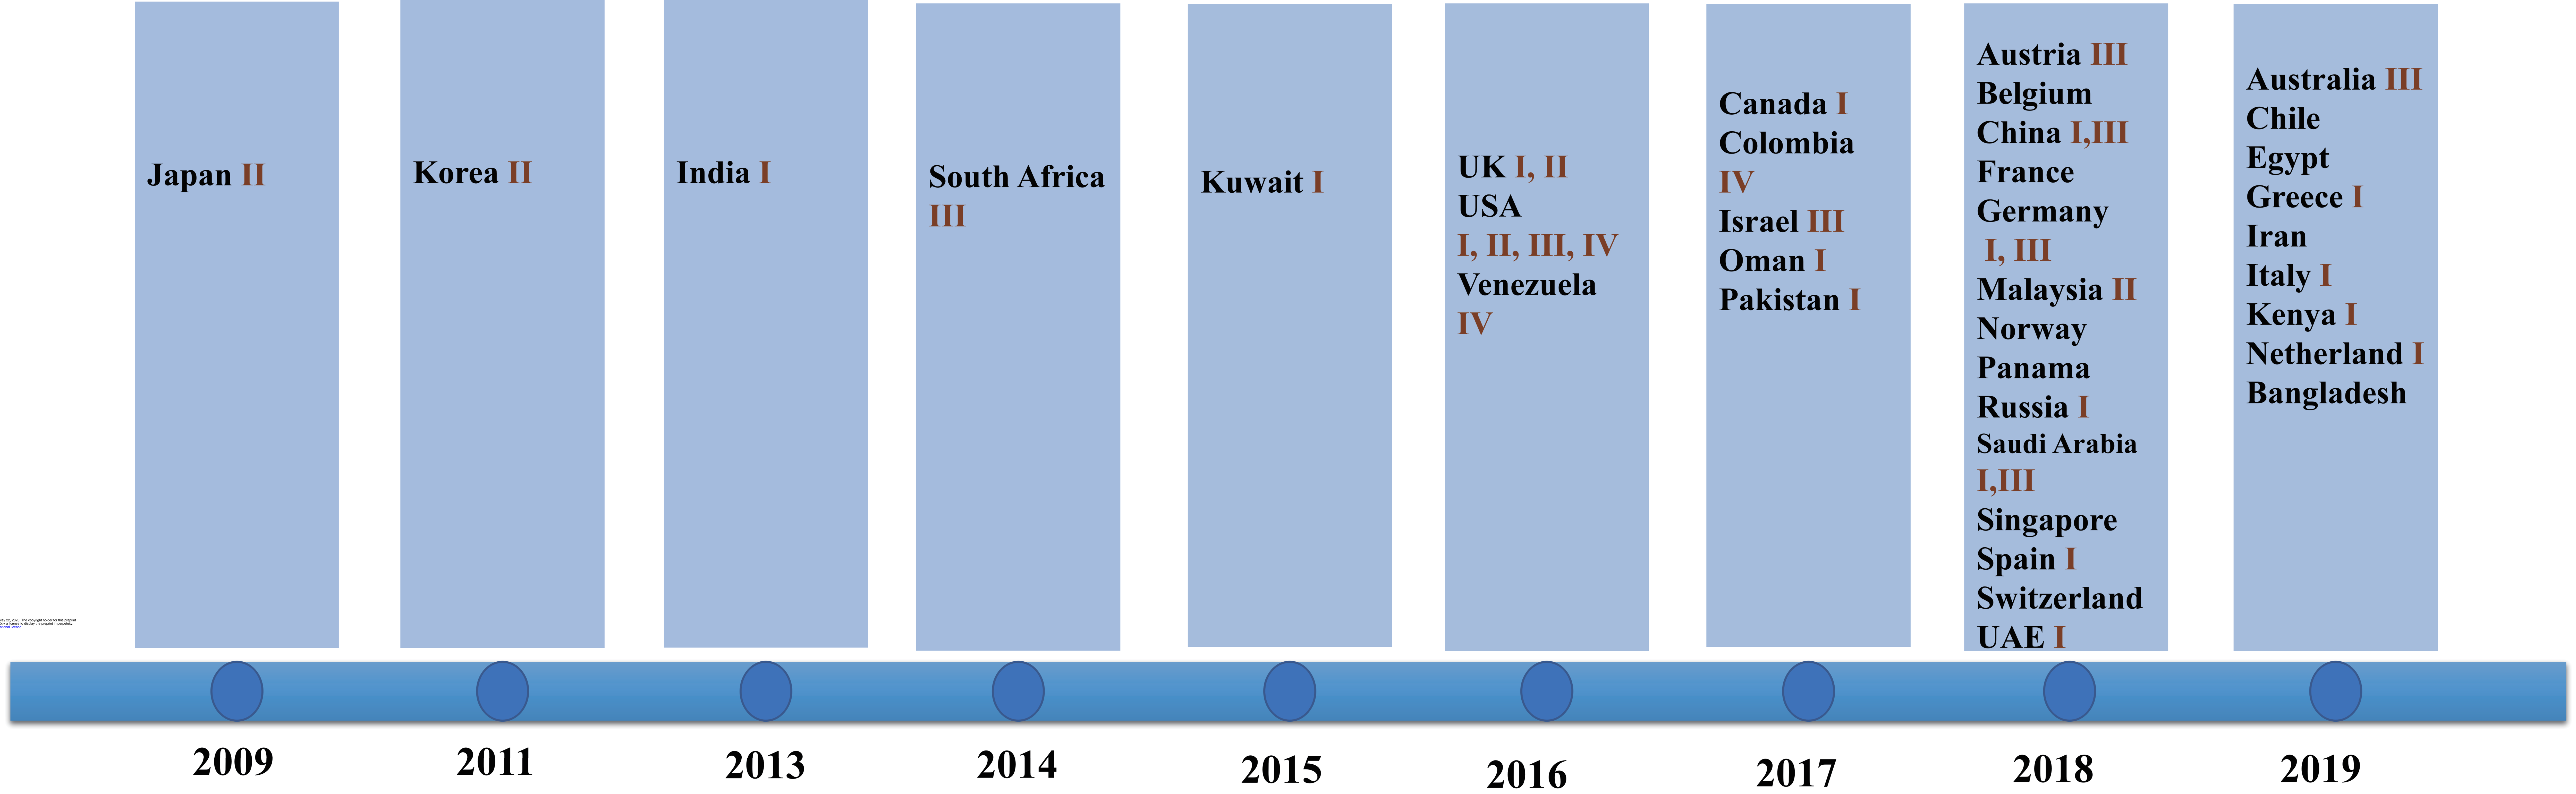

World Bank, World Development Indicators (WDI), 2019. The copyright holder for this content is the International Bank for Reconstruction and Development / The World Bank. All rights reserved. No part of this content may be reproduced, stored in a retrieval system, or transmitted, in any form or by any means, electronic, mechanical, photocopying, recording, or by any information storage or retrieval system, without prior permission in writing from the copyright holder.

**a**

### Gender

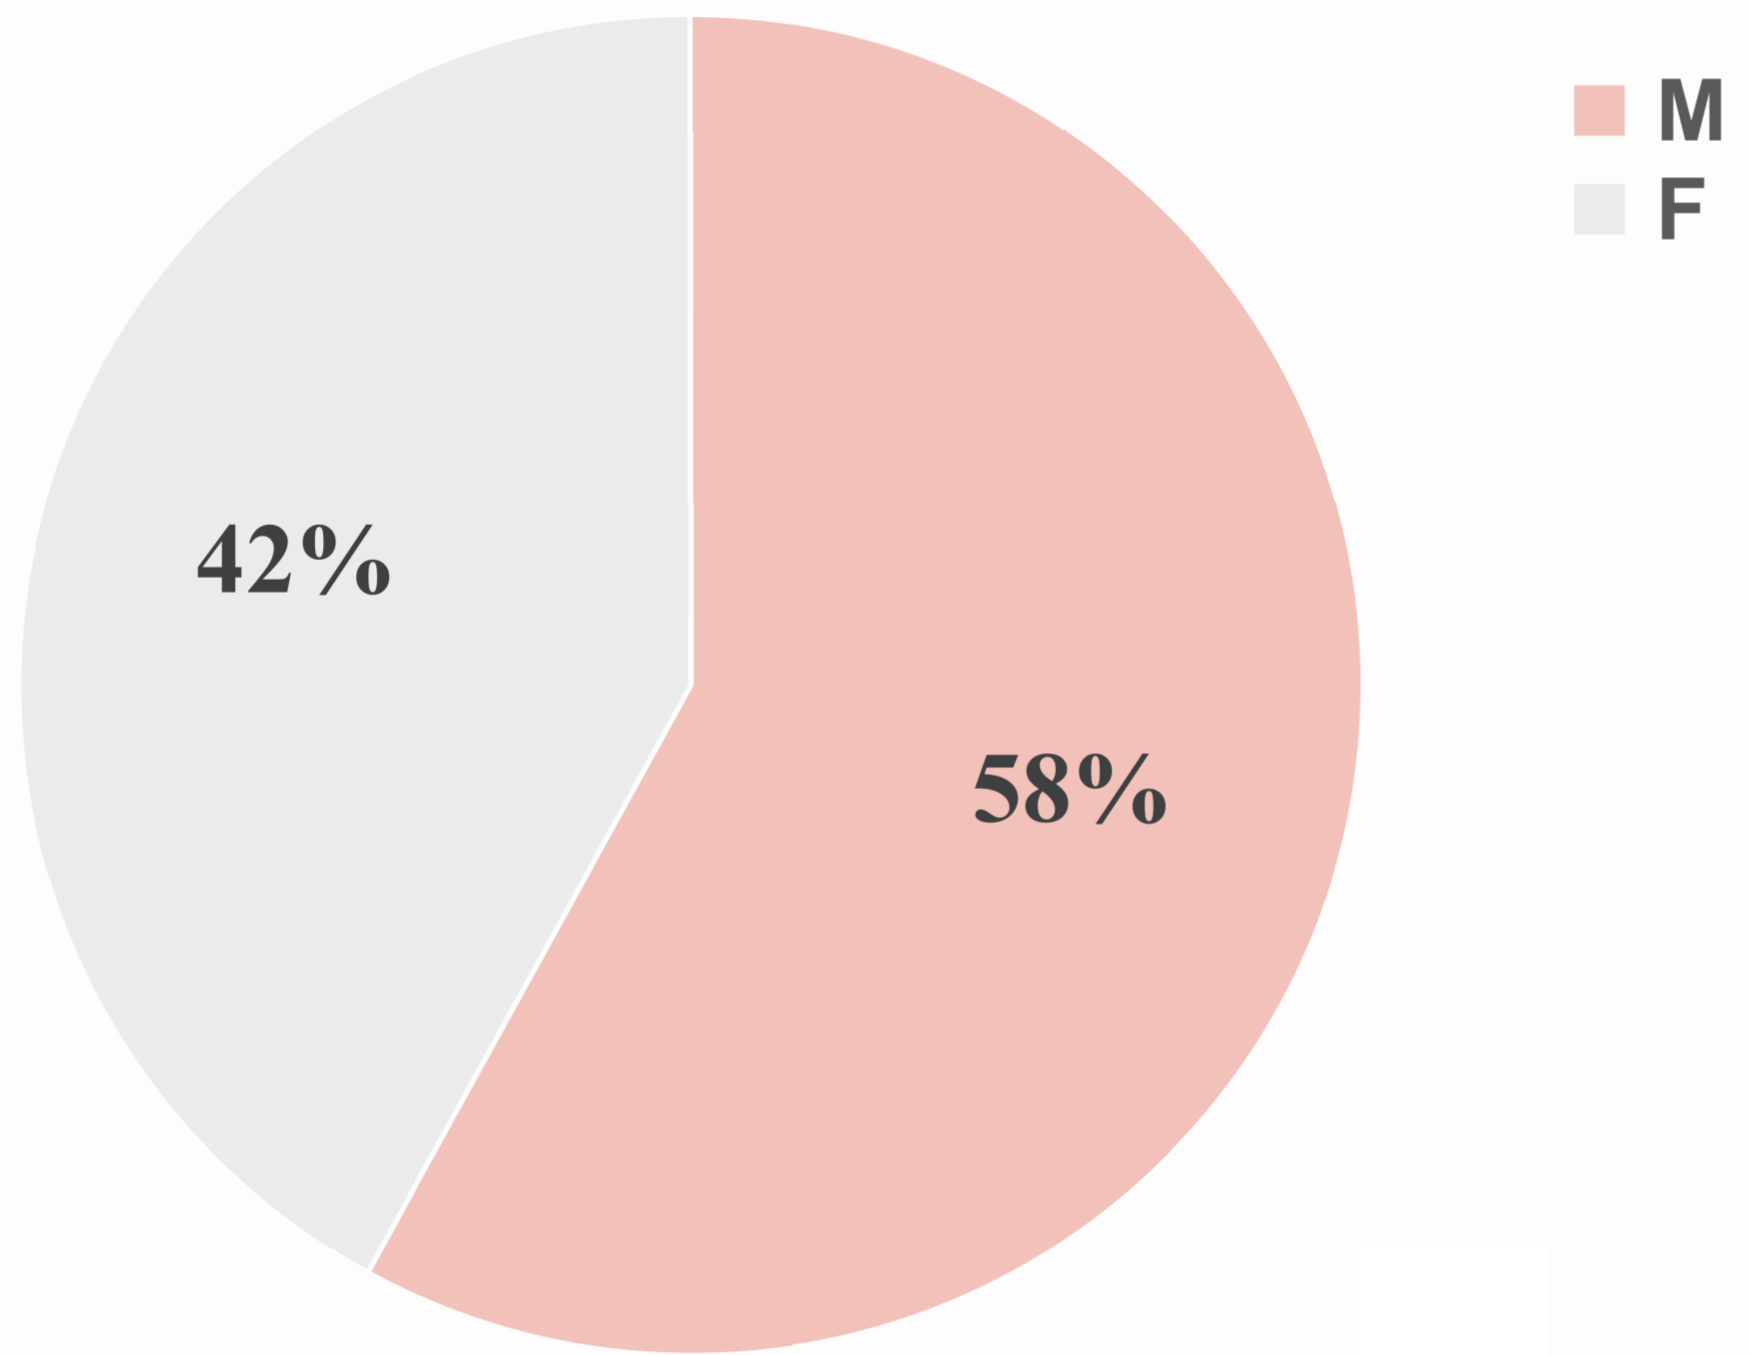

**b**

### Age groups

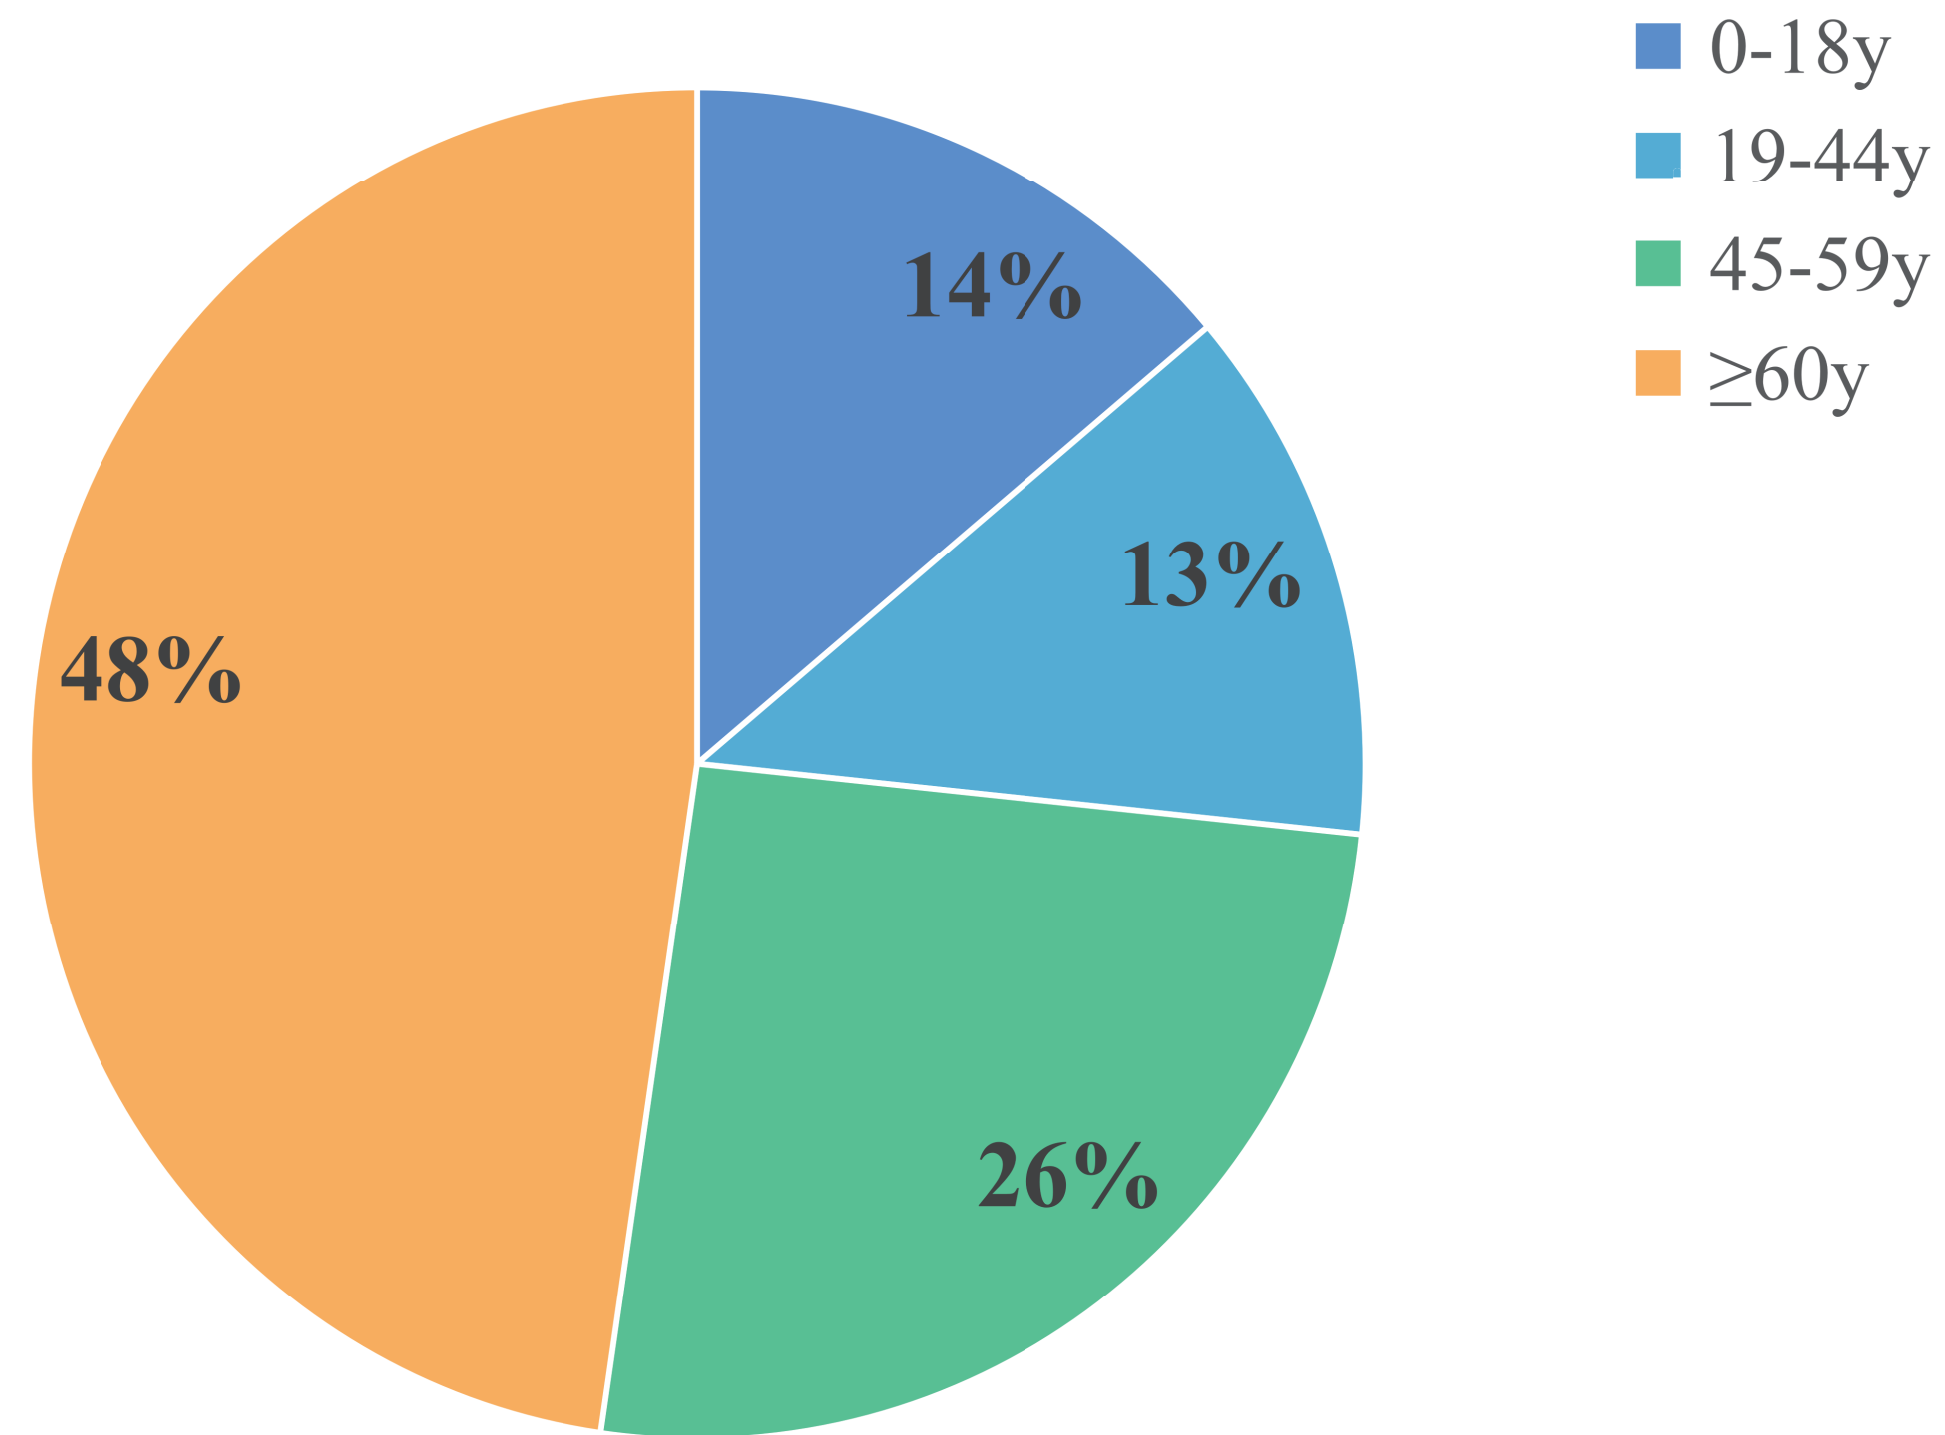



a

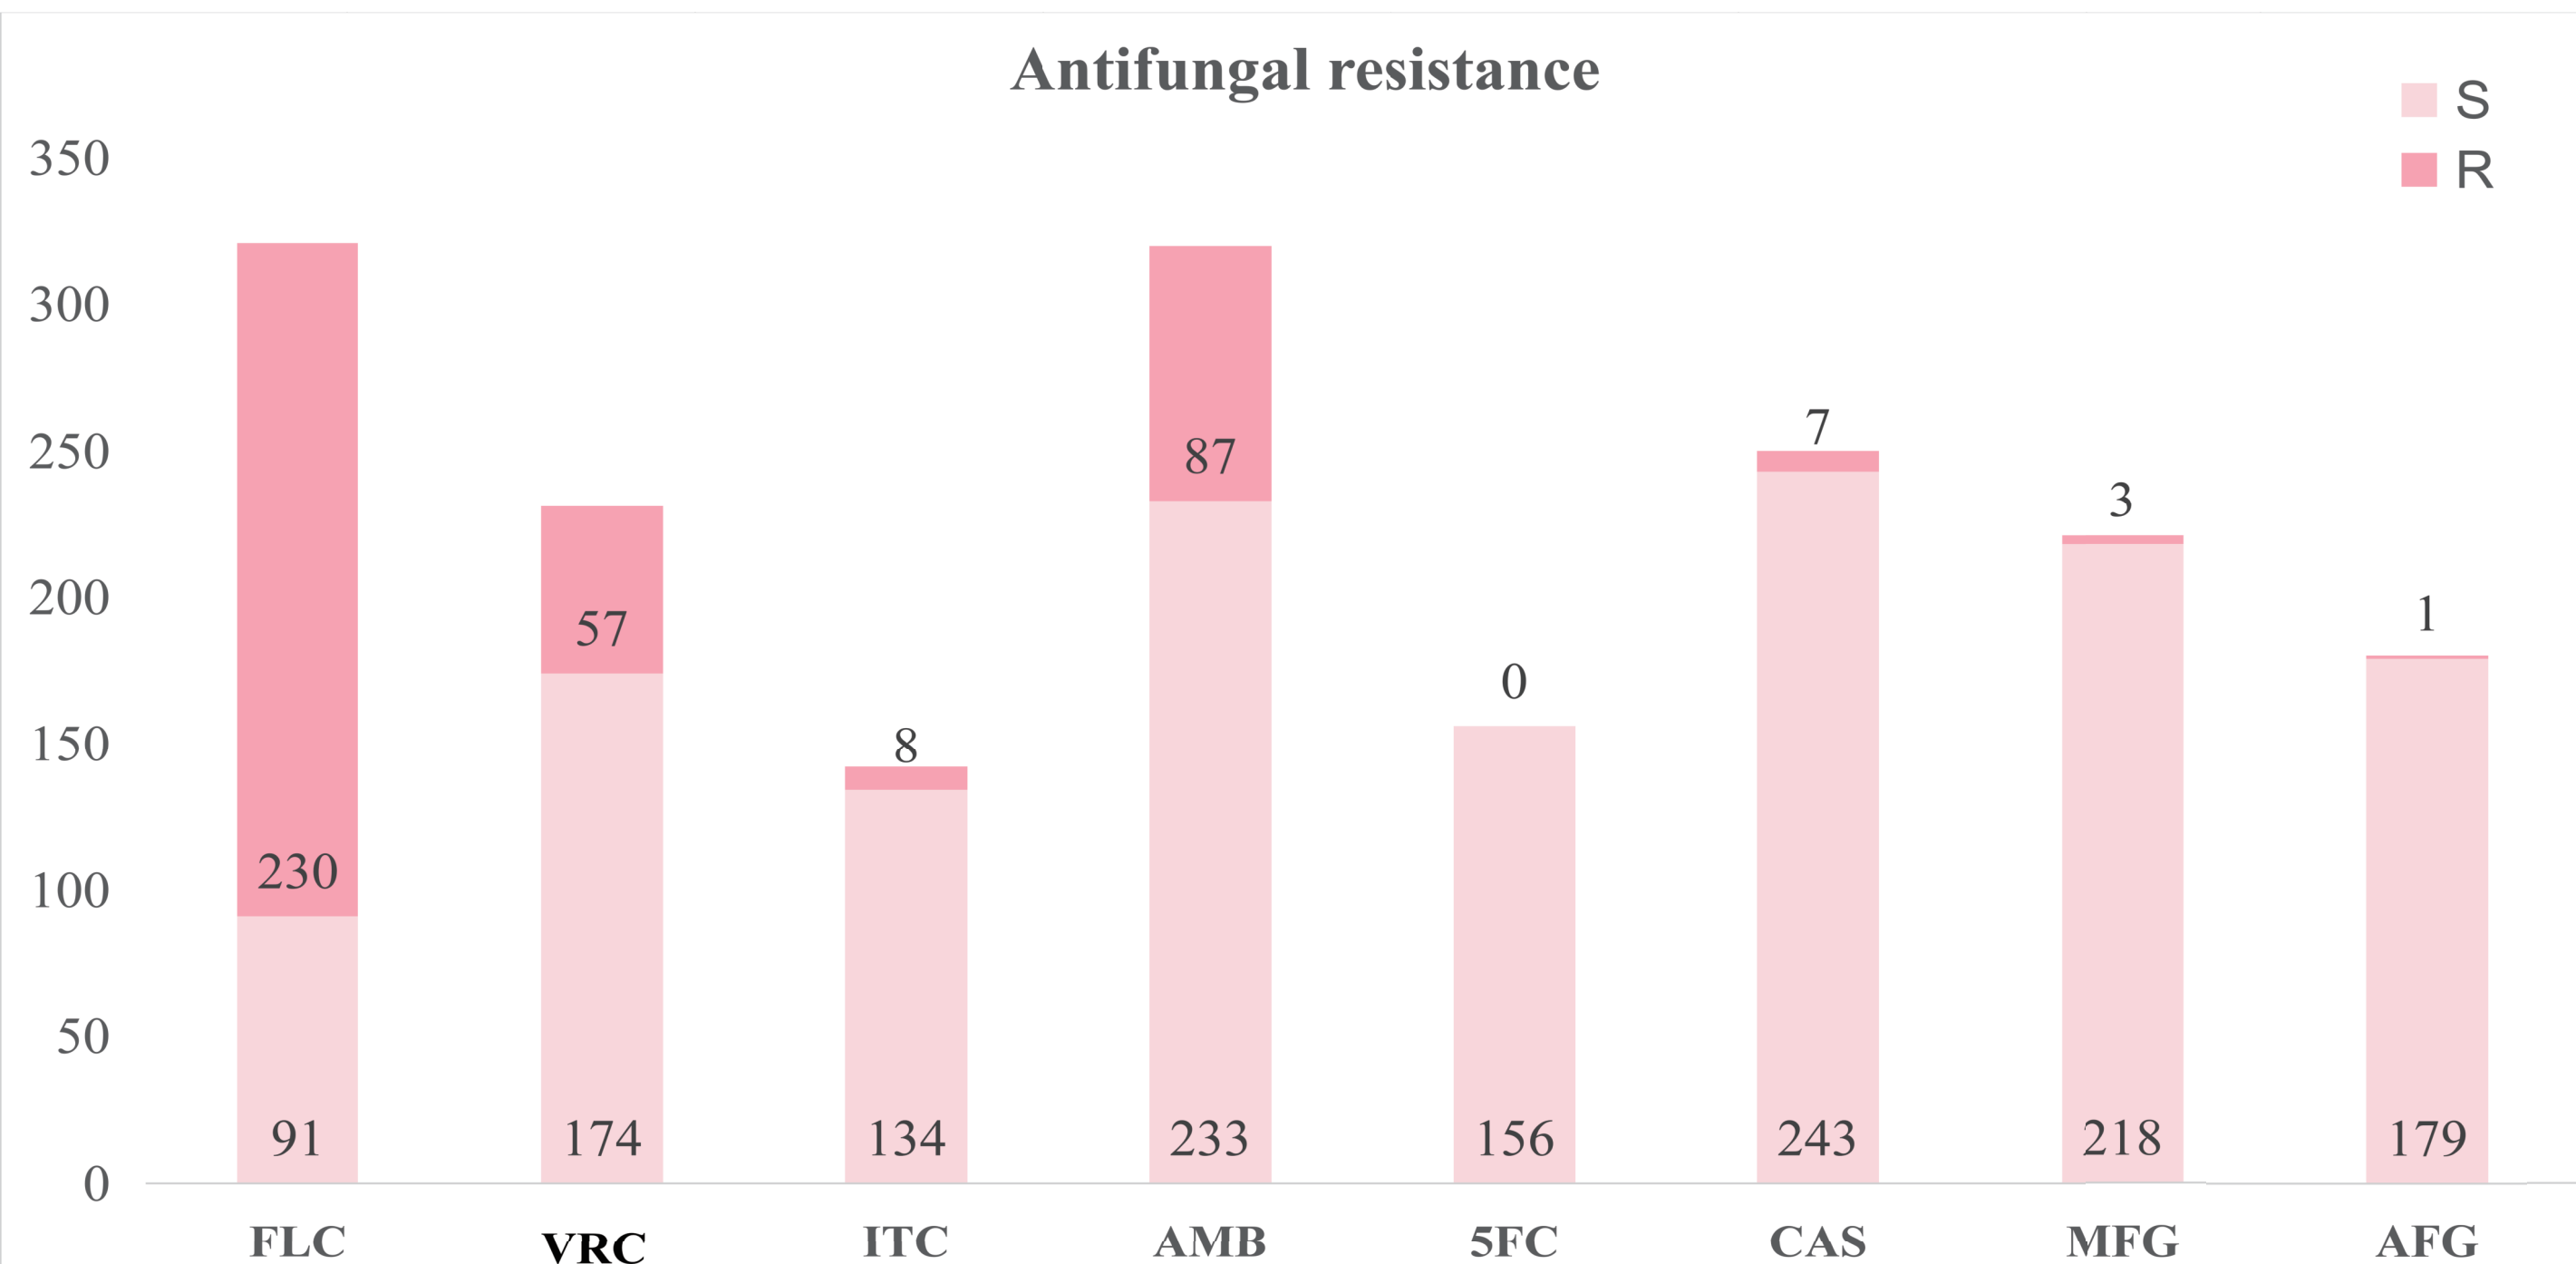

b

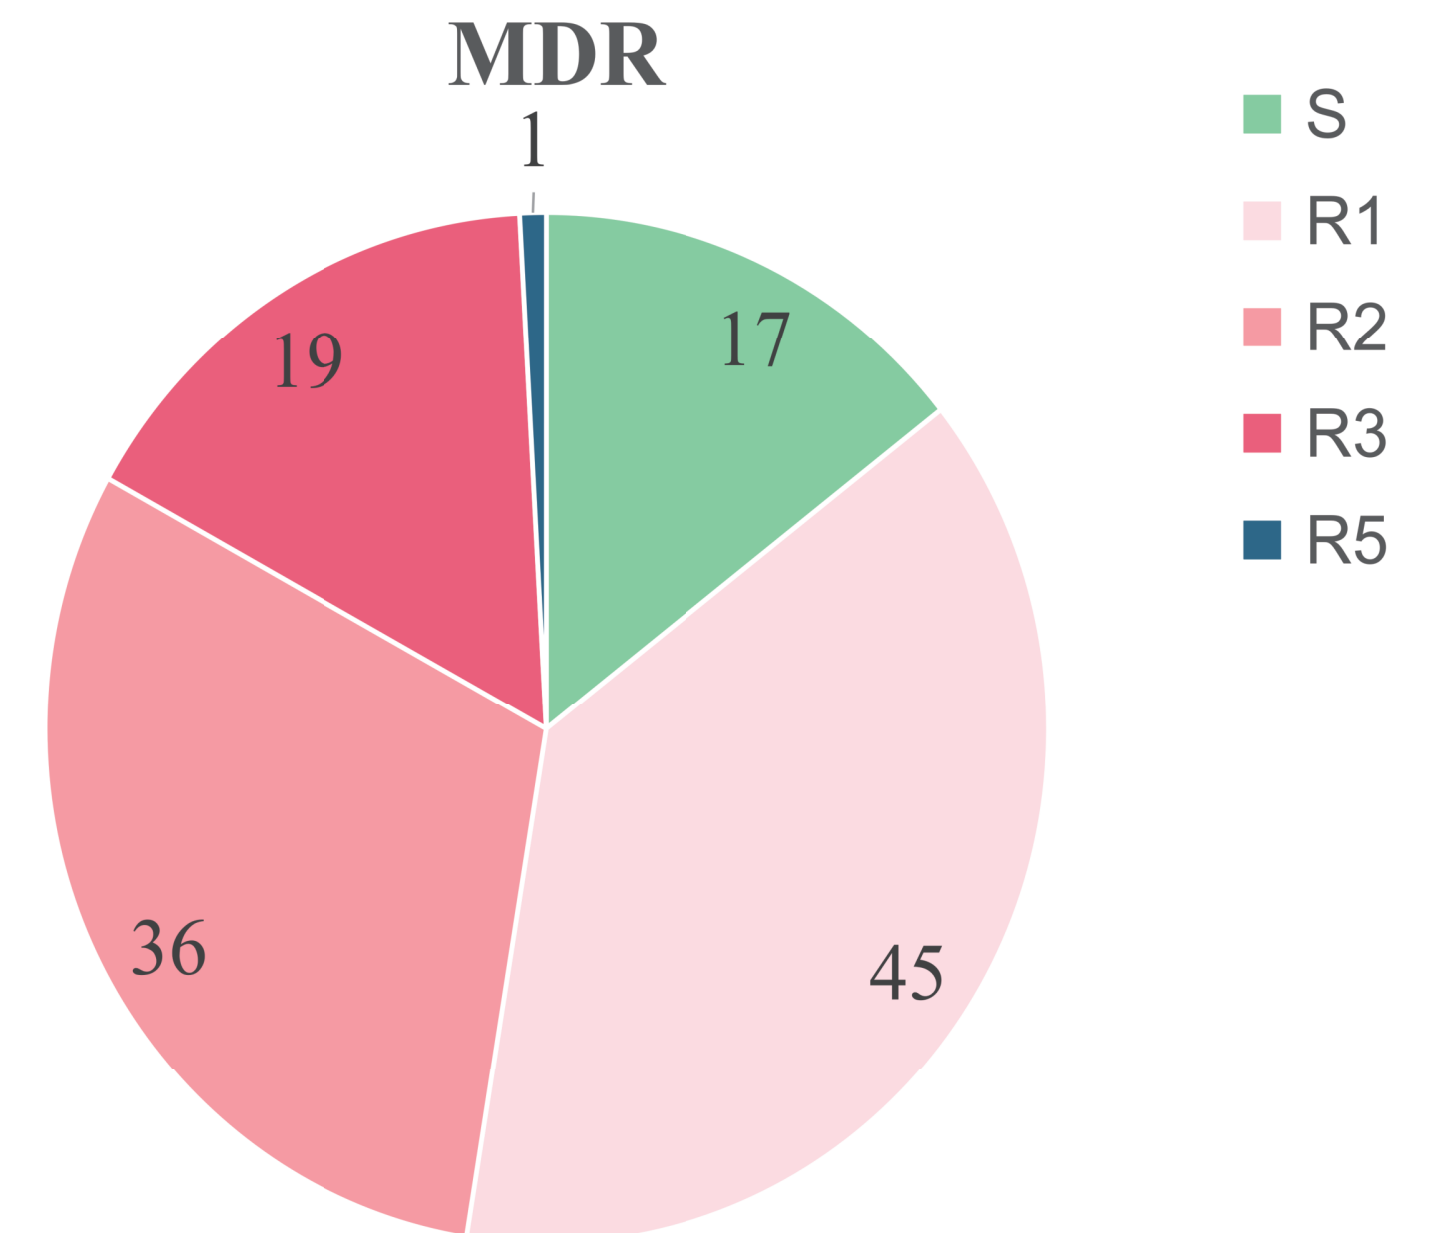

**Table 1. Underlying diseases in *Candida auris*-infected patients**

| Underlying disease     | Number of people with disease | Proportion of patients |
|------------------------|-------------------------------|------------------------|
| Diabetes               | 88                            | 21%                    |
| Kidney disease         | 86                            | 21%                    |
| Ear disease            | 74                            | 18%                    |
| Trauma                 | 63                            | 15%                    |
| Lung disease           | 46                            | 11%                    |
| Tumor                  | 42                            | 10%                    |
| Brain disease          | 41                            | 10%                    |
| Sepsis                 | 39                            | 9%                     |
| Hypertension           | 37                            | 9%                     |
| Heart disease          | 24                            | 6%                     |
| Intestinal disease     | 18                            | 4%                     |
| Liver disease          | 15                            | 4%                     |
| Hematologic disease    | 12                            | 3%                     |
| HIV                    | 12                            | 3%                     |
| Vasculopathy           | 10                            | 2%                     |
| Thyroid disorder       | 7                             | 2%                     |
| Diarrhea               | 7                             | 2%                     |
| Pancreatic disease     | 4                             | 1%                     |
| Bone marrow disease    | 4                             | 1%                     |
| Urinary tract disease  | 4                             | 1%                     |
| Pressure ulcer         | 4                             | 1%                     |
| Nasopharyngeal disease | 3                             | 1%                     |

|                      |    |    |
|----------------------|----|----|
| Psychiatric disorder | 3  | 1% |
| Other diseases       | 33 | 8% |

---

Note: Other diseases are underlying disease categories with proportion of patients <0.5%.

**Table 2: Risk factors involved in contact with *Candida auris* infected patients**

| Risk factor                                                             | Number of patients | Proportion of patients |
|-------------------------------------------------------------------------|--------------------|------------------------|
| ICU                                                                     | 254                | 65%                    |
| Broad-spectrum antibiotic treatment                                     | 232                | 60%                    |
| Central venous catheter                                                 | 182                | 47%                    |
| Urinary catheter                                                        | 141                | 36%                    |
| Underwent surgery in last 30 days                                       | 115                | 30%                    |
| Treatment with antifungal drugs in last 30 days before testing positive | 104                | 27%                    |
| Mechanical ventilation                                                  | 60                 | 15%                    |
| Parenteral nutrition                                                    | 40                 | 10%                    |
| Steroid treatment                                                       | 35                 | 9%                     |
| Immunosuppressant                                                       | 28                 | 7%                     |
| Neutropenia                                                             | 11                 | 3%                     |
| Blood transfusion                                                       | 4                  | 1%                     |

**Table 3:  $\chi^2$  test screening of single factors that may affect patient mortality by category**

| Influencing factor |         | Death toll | Number of survivors | P-value |
|--------------------|---------|------------|---------------------|---------|
| Gender             | Male    | 29         | 24                  | 0.176   |
|                    | Female  | 14         | 21                  |         |
| Sepsis             | Absent  | 38         | 41                  | 0.727   |
|                    | Present | 11         | 10                  |         |
| Fever              | Absent  | 41         | 45                  | 0.511   |
|                    | Present | 8          | 6                   |         |
| Ear disease        | Absent  | 49         | 50                  | 0.325   |
|                    | Present | 0          | 1                   |         |
| Diabetes           | Absent  | 36         | 34                  | 0.458   |
|                    | Present | 13         | 17                  |         |
| Hypoglycemia       | Absent  | 49         | 50                  | 0.325   |
|                    | Present | 0          | 1                   |         |
| Hypertension       | Absent  | 43         | 41                  | 0.315   |
|                    | Present | 6          | 10                  |         |
| Hyperlipidemia     | Absent  | 47         | 50                  | 0.965   |
|                    | Present | 1          | 1                   |         |
| Lung disease       | Absent  | 33         | 38                  | 0.43    |
|                    | Present | 16         | 13                  |         |
| Tracheal disease   | Absent  | 47         | 50                  | 0.534   |
|                    | Present | 2          | 1                   |         |

|                        |         |    |    |              |
|------------------------|---------|----|----|--------------|
| Intestinal disease     | Absent  | 42 | 46 | 0.491        |
|                        | Present | 7  | 5  |              |
| Brain disease          | Absent  | 37 | 38 | 0.908        |
|                        | Present | 12 | 13 |              |
| Kidney disease         | Absent  | 31 | 41 | <b>0.048</b> |
|                        | Present | 18 | 10 |              |
| Liver disease          | Absent  | 46 | 49 | 0.614        |
|                        | Present | 3  | 2  |              |
| Gallbladder disease    | Absent  | 48 | 50 | 0.977        |
|                        | Present | 1  | 1  |              |
| Tumor                  | Absent  | 34 | 43 | <b>0.076</b> |
|                        | Present | 15 | 8  |              |
| Chemotherapy           | Absent  | 46 | 50 | 0.288        |
|                        | Present | 3  | 1  |              |
| Radiotherapy           | Absent  | 48 | 51 | 0.305        |
|                        | Present | 1  | 0  |              |
| Nasopharyngeal disease | Absent  | 47 | 51 | 0.145        |
|                        | Present | 2  | 0  |              |
| Laryngeal disease      | Absent  | 48 | 51 | 0.305        |
|                        | Present | 1  | 0  |              |
| Hematologic disease    | Absent  | 43 | 46 | 0.697        |
|                        | Present | 6  | 5  |              |
| Heart disease          | Absent  | 39 | 43 | 0.539        |
|                        | Present | 10 | 8  |              |

|                                          |         |    |    |       |
|------------------------------------------|---------|----|----|-------|
| Neuropathy                               | Absent  | 48 | 51 | 0.305 |
|                                          | Present | 1  | 0  |       |
| Diseases of the ovary                    | Absent  | 49 | 50 | 0.325 |
|                                          | Present | 0  | 1  |       |
| Vasculopathy                             | Absent  | 46 | 45 | 0.324 |
|                                          | Present | 3  | 6  |       |
| Abnormal coagulation function            | Absent  | 49 | 50 | 0.325 |
|                                          | Present | 0  | 1  |       |
| Thyroid disorder                         | Absent  | 47 | 50 | 0.534 |
|                                          | Present | 2  | 1  |       |
| Drug abuse                               | Absent  | 49 | 50 | 0.325 |
|                                          | Present | 0  | 1  |       |
| Acquired immunodeficiency syndrome (AID) | Absent  | 47 | 49 | 0.967 |
|                                          | Present | 2  | 2  |       |
| Bone marrow disease                      | Absent  | 47 | 49 | 0.967 |
|                                          | Present | 2  | 2  |       |
| Oral disease                             | Absent  | 49 | 50 | 0.325 |
|                                          | Present | 0  | 1  |       |
| Urinary tract disease                    | Absent  | 47 | 49 | 0.967 |
|                                          | Present | 2  | 2  |       |
| Endometrial disease                      | Absent  | 49 | 50 | 0.325 |
|                                          | Present | 0  | 1  |       |
| Cytomegalovirus (CMV)                    | Absent  | 48 | 51 | 0.305 |
|                                          | Present | 1  | 0  |       |

|                      |           |    |    |       |
|----------------------|-----------|----|----|-------|
| Psychiatric disorder | Absent    | 48 | 49 | 0.582 |
|                      | Present   | 1  | 2  |       |
| Psoriasis            | Absent    | 48 | 51 | 0.305 |
|                      | Present   | 1  | 0  |       |
| Pressure ulcer       | Absent    | 47 | 49 | 0.967 |
|                      | Present   | 2  | 2  |       |
| Asthma               | Absent    | 48 | 51 | 0.305 |
|                      | Present   | 1  | 0  |       |
| Adrenal glands       | Absent    | 49 | 50 | 0.325 |
|                      | Present   | 0  | 1  |       |
| Prostate gland       | Absent    | 48 | 51 | 0.305 |
|                      | Present   | 1  | 0  |       |
| Breasts              | Absent    | 49 | 50 | 0.325 |
|                      | Present   | 0  | 1  |       |
| Bones                | Absent    | 48 | 50 | 0.977 |
|                      | Present   | 1  | 1  |       |
| Trauma               | Absent    | 45 | 49 | 0.372 |
|                      | Present   | 4  | 2  |       |
| Resistant            | Sensitive | 5  | 1  | 0.399 |
|                      | 1 type    | 5  | 6  |       |
|                      | 2 types   | 8  | 10 |       |
|                      | 3 type    | 5  | 6  |       |
|                      | 5 types   | 1  | 0  |       |



Age #

64 (45.50–73.35) 53.50 (39.75–0.187

72)

---

Note: # Non-normal distribution after normality test was carried out and expressed as median (interquartile range). P<0.1: Significant

**Table 4: Multivariate analysis results**

|                |         | B      | Standard error | Wald statistic | Degrees of freedom | Significance | OR    | 95%: confidence interval of OR |             |
|----------------|---------|--------|----------------|----------------|--------------------|--------------|-------|--------------------------------|-------------|
|                |         |        |                |                |                    |              |       | Lower limit                    | Upper limit |
| Kidney disease | Present | -1.135 | 0.484          | 5.505          | 1                  | 0.019        | 0.321 | 0.124                          | 0.829       |
|                | Absent  | 0      |                |                |                    |              | 1     |                                |             |
| Tumor          | Present | -1.156 | 0.519          | 4.962          | 1                  | 0.026        | 0.315 | 0.114                          | 0.87        |
|                | Absent  | 0      |                |                |                    |              | 1     |                                |             |
| Constant       |         | 1.643  | 0.628          | 6.847          | 1                  | 0.009        | 5.172 |                                |             |

Note: B: regression coefficient; OR: odds ratio.
